# Supplementary material
Source: PubMed Central journal article supplement (PMC4246003)
Supplement: nl503584q_si_001.pdf [file nl503584q_si_001.pdf]

## Supporting Information

# The Gold-Copper Nano-Alloy, “*Tumbaga*”, in the Era of Nano: Phase Diagram and Segregation

*Grégory Guisbiers*<sup>1,\*</sup>, *Sergio Mejia-Rosales*<sup>2</sup>, *Subarna Khanal*<sup>1</sup>, *Francisco Ruiz-Zepeda*<sup>1</sup>, *Robert L. Whetten*<sup>1</sup>, *Miguel José-Yacaman*<sup>1</sup>

<sup>1</sup> Department of Physics & Astronomy, University of Texas at San Antonio, One UTSA Circle, San Antonio, TX 78249, United States of America

<sup>2</sup> Center for Innovation, Research and Development in Engineering and Technology (CIIDIT), and CFCFIM-Facultad de Ciencias Fisico-Matematicas, Universidad Autonoma de Nuevo Leon, San Nicolas de los Garza, NL 66450, Mexico

\*E-mail: [gregory.guisbiers@physics.org](mailto:gregory.guisbiers@physics.org)

As a first stage, Au nanoparticles were synthesized by the polyol method: A volume of 25 mL of ethylene glycol (EG) and 2 gm of PVP (55K) was mixed and vigorously stirred in a round-bottom flask for 10 min and refluxed at 200 °C using a hot oil bath. 0.025 M of 2 mL HAuCl<sub>4</sub>.xH<sub>2</sub>O were added to the solution and the resulting mixture was stirred vigorously for 5 min. At this point the solution turned purple-red color, evidencing the formation of Au

nanoparticles. Afterwards, for the preparation of Cu-Au bimetallic nanoparticles, 14 mL of EG solution and 249 mM of PVP (55K) were mixed in a three-neck round-bottom flask and refluxed for 10 min. at a constant temperature of 200 °C under Argon ambient. The solution was mixed with 3 mL of Au seeds, and the mixture was kept under magnetic stirring for 10 min. Afterwards, a solution of 50 mM of  $\text{CuSO}_4$  and 3 mL of EG was injected drop by drop using a syringe pump, and the resulting mixture was stirred vigorously for 1h at 200 °C in Argon ambient. After 1h the mixture solution turned brown-blue color, evidencing the formation of the bimetallic nanoparticles.
